# Supplementary material
Source: PubMed Central journal article supplement (PMC5533242)
Supplement: ASN.2016121341SupplementaryData.pdf [file ASN.2016121341SupplementaryData.pdf]

**Supplementary Table I.** Details of patients stratified according to cumulative exposure to FO measured over their first year of dialysis. Patients were classified as overhydrated or non-overhydrated after dividing the cumulative exposure for the days of exposure. Such calculation takes back the cumulative estimate to the original scale (single measurement). Weight, BP and BMI data represent the average value of the measurements of these variables made on the day of the BCM study (for the estimate of Fluid Overload)

|                                                    | <b>Overhydrated*</b><br>(male: relOH $\geq$ 15%,<br>female:<br>relOH $\geq$ 13%) | <b>Non-overhydrated*</b><br>(male: relOH<15%,<br>female:<br>relOH<13%) | <b>p-value</b> | <b>All subjects</b>             |
|----------------------------------------------------|----------------------------------------------------------------------------------|------------------------------------------------------------------------|----------------|---------------------------------|
| Patients (N)                                       | 6754                                                                             | 16091                                                                  |                | 22845                           |
| Follow-up (days)                                   | 369 $\pm$ 285                                                                    | 391 $\pm$ 294                                                          | <0.001         | 385 $\pm$ 291                   |
| female/male (N,%)                                  | 2754 / 4000<br>(40.8% / 59.2%)                                                   | 6445 / 9646<br>(40.1% / 59.9%)                                         | 0.31           | 9199 / 13646<br>(40.3% / 59.7%) |
| Age (years)                                        | 60.2 $\pm$ 15.3                                                                  | 60.5 $\pm$ 15.5                                                        | 0.21           | 60.4 $\pm$ 15.4                 |
| Height [cm]                                        | 165.4 $\pm$ 10.2                                                                 | 164.9 $\pm$ 9.9                                                        | 0.002          | 165.1 $\pm$ 10.0                |
| Weight pre-dialysis (kg)                           | 70.3 $\pm$ 16.8                                                                  | 74.2 $\pm$ 16.6                                                        | <0.001         | 73.0 $\pm$ 16.7                 |
| Preweight – postweight (kg)                        | 1.9 $\pm$ 1.2                                                                    | 1.6 $\pm$ 1.7                                                          | <0.001         | 1.7 $\pm$ 1.6                   |
| BMI pre-dialysis (kg/m <sup>2</sup> )              | 25.8 $\pm$ 13.1                                                                  | 27.5 $\pm$ 14.5                                                        | <0.001         | 27.0 $\pm$ 14.1                 |
| BP pre-dialysis (mmHg)                             | 146 $\pm$ 26 / 76 $\pm$ 15                                                       | 140 $\pm$ 24 / 74 $\pm$ 14                                             | <0.001         | 142 $\pm$ 25 / 75 $\pm$ 15      |
| Treatment time (min)                               | 234 $\pm$ 33                                                                     | 234 $\pm$ 34                                                           | 0.30           | 234 $\pm$ 34                    |
| UF rate [ml/h]                                     | 593 $\pm$ 260                                                                    | 510 $\pm$ 248                                                          | 0.02           | 535 $\pm$ 254                   |
| Number of BCM meas. within the first dialysis year | 10.0 $\pm$ 5.5                                                                   | 9.8 $\pm$ 4.6                                                          | 0.15           | 9.9 $\pm$ 4.9                   |
| Patients on anti-hypertensive drugs (%)            | 55.5%                                                                            | 54.3%                                                                  | <0.001         | 54.6%                           |
| Patients with Catheter (N, %)                      | 3546 (52.5%)                                                                     | 7332 (45.6%)                                                           | <0.001         | 10878 (47.6%)                   |
| Patients smoking (N, %)                            | 1474 (21.8%)                                                                     | 3489 (21.7%)                                                           | 0.81           | 4963 (21.7%)                    |
| Ethnicity: White (N, %)                            | 5615 (83.1%)                                                                     | 14003 (87.0%)                                                          | <0.001         | 19618 (85.9%)                   |
| <b>Comorbidities</b>                               |                                                                                  |                                                                        |                |                                 |
| Diabetes                                           | 36.8 %                                                                           | 21.6 %                                                                 | <0.001         | 26.1 %                          |
| Coronary artery disease                            | 490 (7.3%)                                                                       | 985 (6.1%)                                                             | 0.002          | 1475 (6.5%)                     |
| Congestive heart failure                           | 1396 (20.7%)                                                                     | 2526 (15.7%)                                                           | <0.001         | 3922 (17.2%)                    |
| Cerebrovascular disease (stroke)                   | 712 (10.5%)                                                                      | 1690 (10.5%)                                                           | 0.93           | 2402 (10.5%)                    |

|                                   |              |               |        |               |
|-----------------------------------|--------------|---------------|--------|---------------|
| Peripheral vascular disease       | 1075 (15.9%) | 1916 (11.9%)  | <0.001 | 2991 (13.1%)  |
| Dementia                          | 56 (0.8%)    | 95 (0.6%)     | 0.04   | 151 (0.7%)    |
| Chronic broncho-pulmonary disease | 544 (8.1%)   | 1088 (6.8%)   | <0.001 | 1632 (7.1%)   |
| Paraplegia                        | 29 (0.4%)    | 40 (0.2%)     | 0.02   | 69 (0.3%)     |
| Liver disease                     | 611 (9.0%)   | 1299 (8.1%)   | 0.02   | 1910 (8.4%)   |
| Connective tissue disorder        | 113 (1.7%)   | 175 (1.1%)    | <0.001 | 288 (1.3%)    |
| <b>Biochemical measurements</b>   |              |               |        |               |
| Hb (g/dl)                         | 9.8 ± 1.8    | 10.1 ± 1.7    | <0.001 | 10.0 ± 1.7    |
| Albumin (g/dl)                    | 3.6 ± 0.6    | 3.8 ± 0.5     | <0.001 | 3.7 ± 0.5     |
| Na (mMol/L)                       | 137.9 ± 4.1  | 137.8 ± 4.5   | 0.477  | 137.8 ± 4.4   |
| Phosphate (mg/dl)                 | 4.6 ± 1.6    | 4.8 ± 1.9     | <0.001 | 4.7 ± 1.8     |
| LDL Cholesterol (mg/dl)           | 99.3 ± 46.2  | 103.0 ± 157.9 | 0.008  | 101.9 ± 135.2 |
| HDL Cholesterol (mg/dl)           | 43.3 ± 16.6  | 41.4 ± 15.7   | <0.001 | 42.0 ± 16.0   |
| CRP (mg/L)                        | 18.4 ± 34.7  | 15.8 ± 31.0   | <0.001 | 16.6 ± 32.1   |
| ktv                               | 1.38 ± 1.10  | 1.40 ± 2.81   | 0.668  | 1.39 ± 2.43   |
| PCRn (g/kg/day)                   | 1.0 ± 0.3    | 1.0 ± 1.0     | 0.010  | 1.0 ± 0.9     |
| FO pre-dialysis (L)               | 4.5 ± 3.1    | 1.7 ± 2.1     | <0.001 | 2.5 ± 2.8     |

Abbreviations: PCRn = normalized protein catabolic rate, Hb = hemoglobin, Na = sodium, CRP = C reactive protein, FO = fluid overload.

**Supplementary table II:** missing values , number and %.

|                    |               |
|--------------------|---------------|
| Phosphate:         | 921 (1.0%)    |
| CRP:               | 29286 (31.9%) |
| HDL:               | 22275 (24.2%) |
| LDL:               | 22925 (25.0%) |
| Na:                | 23097 (25.1%) |
| ktv:               | 2084 (2.3%)   |
| Albumin:           | 2754 (3.0%)   |
| Hb:                | 1516 (1.7%)   |
| PCRn:              | 12093 (13.2%) |
| total_cholesterol: | 16012 (17.4%) |
| triglycerides:     | 18337 (20.0%) |
| Phosphate:         | 921 (1.0%)    |
| CRP:               | 29286 (31.9%) |
| HDL:               | 22275 (24.2%) |
| LDL:               | 22925 (25.0%) |
| Na:                | 23097 (25.1%) |
| ktv:               | 2084 (2.3%)   |
| Albumin:           | 2754 (3.0%)   |
| Hb:                | 1516 (1.7%)   |

|                    |               |
|--------------------|---------------|
| PCRn:              | 12093 (13.2%) |
| total_cholesterol: | 16012 (17.4%) |
| triglycerides:     | 18337 (20.0%) |
| tx_time_pat:       | 16 (0.0%)     |
|                    |               |
|                    |               |
